# Supplementary material for: Adaptation of Commensal Escherichia coli in Tomato Fruits: Motility, Stress, Virulence
Source: MDPI journal article supplement (doi:10.3390/biology12040633), 2023-04-21
Supplement: s1 [file s1]

**Supplementary material - Table S1. Primers used in this study.**

| <b>Gene</b>           | <b>Function</b>                             | <b>Forward 5'-3'</b>      | <b>Reverse 5'-3'</b>      |
|-----------------------|---------------------------------------------|---------------------------|---------------------------|
| <i>narG</i>           | Respiratory nitrate reductase 1 alpha chain | TCTATAACCACTCCAGCCAG      | CTCTTTCAGGGATTCACCG       |
| <i>papA_1</i>         | Pap fimbrial major pilin protein            | AGTCTATTGATTTTGGACAACTTTC | GGCAGTAATGTCACAATTAATAAT  |
| <i>fimH</i>           | Type 1 fimbriae D-mannose specific adhesin  | CGGGTTGTTTATAATTTCGAGAAC  | ATCATTATTGGCGTAAATATTCCAC |
| <i>atoB-C-D</i>       | metabolism of Acetyl-CoA                    | CTGCTCCTCGACGAAATTGG      | TGCCTTCTTTCACCATTTGCC     |
| <i>acrF</i>           | Multidrug export protein AcrF               | GGGTGCTGGCCATTATTCTG      | GTTCGATAACCTGCGTCACC      |
| <i>murE-ftsL-ftsL</i> | Peptidoglycan                               | GGGCGATGGGGAAATTGAAA      | GAACACTTCCATACGTCCGC      |
| <i>fliC</i>           | flagellin                                   | ATAATCTACGCCGCCAACT       | GACTCCATCCAGGACGAAA       |
| <i>flhD</i>           | Gene Involved in biofilm formation          | ATCGTCTGGTGGCTGTCAA       | GTCCGCTATGTTTCGTCTCG      |
| 16S                   | Ribosomal DNA                               | CCTACGGGNGGCWGCAG         | GACTACNVGGGTWTCTAATCC     |
| <i>rpoD</i>           | RNA polymerase $\sigma^{70}$ factor         | AGCAAAACCCGCAGTCAC        | CCATGTCGTTGATCATTTGG      |
